# Supplementary material
Source: PubMed Central journal article supplement (PMC4490625)
Supplement: NIHMS60521-supplement-Table_1.pdf [file NIHMS60521-supplement-Table_1.pdf]

**Table 1.** Heart samples used for FACS analysis (n=10)

| <u>Weeks PC</u> | <u>Carnegie/Fetal stage</u> |
|-----------------|-----------------------------|
| 7               | 21                          |
| 8               | 23                          |
| 8               | 23                          |
| 8               | 23                          |
| 9               | F1                          |
| 9               | F1                          |
| 9               | F1                          |
| 10              | F2                          |
| 10              | F2                          |
| 12              | F4                          |
