# Supplementary material
Source: PubMed Central journal article supplement (PMC4490625)

**A**

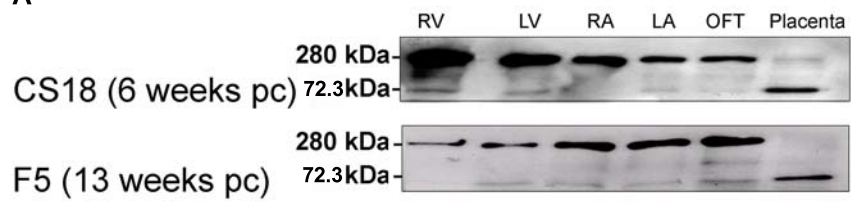

**B**

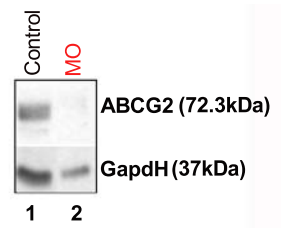

Supplement: NIHMS60521-supplement-Supplementary_Figure_1.pdf [file NIHMS60521-supplement-Supplementary_Figure_1.pdf]
